# Supplementary material for: Volatile codes: Correlation of olfactory signals and reception in Drosophila-yeast chemical communication
Source: PubMed Central journal article supplement (PMC4585764; doi:10.1038/srep14059), 2015-09-22

## Supplementary Information

### **Volatile codes: Correlation of olfactory signals and reception in *Drosophila*-yeast chemical communication**

Nicole H. Scheidler<sup>1</sup>, Cheng Liu<sup>2</sup>, Kelly A. Hamby<sup>3</sup>, Frank G. Zalom<sup>4</sup> and Zainulabeuddin Syed<sup>1\*</sup>

<sup>1\*</sup>Department of Biological Sciences & Eck Institute for Global Health  
University of Notre Dame, Notre Dame, IN 46556, USA

<sup>2</sup>Center for Research Computing, University of Notre Dame, Notre Dame, IN 46556, USA <sup>3</sup>  
Entomology Department, University of Maryland, College Park, MD 20742, USA

<sup>4</sup>Entomology and Nematology Department, University of California, Davis, CA 95616, USA

### **Supplementary Table and Figure Legends**

**Supplementary Table S1. The 25 most intense responses (marked with corresponding colors) induced by the odor constituents from each yeast in both fly species indicated as frequency of the response occurrence.** Since the top 25 responses were not the same for each yeast,

a compilation resulted in a total of 53 responses. For each profile (columns), the 28 responses not part of the initial selection were retrieved or determined not present (x). Each of the 53 were given a unique identification number (Compd#) based on time of response (RT) across yeasts (indicated by different colors) and flies (represented as *D. s* and *D. m*). Numbers indicate the frequency of a response recorded. “x” resulted either due to the absence or lower abundance (below the detection threshold of the fly) of a given yeast constituent. The gray rows represent

the top 23 constituents used in the heat map analysis. Absolute identification was based on matching Kovat's Indices (KI) between FID and MS, comparable spectra with NIST library, and finally injecting synthetic standards to confirm KI and biological activity.

| Compd# | RT (min) | Kovats Indices |           | Identified constituents* | <i>P. terricola</i> |             | <i>P. kluyveri</i> |             | <i>H. uvarum</i> |             | <i>C. californica</i> |             | <i>C. zemplinina</i> |             | <i>S. cerevisiae</i> |             |
|--------|----------|----------------|-----------|--------------------------|---------------------|-------------|--------------------|-------------|------------------|-------------|-----------------------|-------------|----------------------|-------------|----------------------|-------------|
|        |          | FID            | MS Synth. |                          | D. s<br>N=6         | D. m<br>N=6 | D. s<br>N=6        | D. m<br>N=6 | D. s<br>N=6      | D. m<br>N=5 | D. s<br>N=6           | D. m<br>N=5 | D. s<br>N=6          | D. m<br>N=5 | D. s<br>N=6          | D. m<br>N=6 |
| 1      | 2.62     | ND             |           |                          | x                   | x           | 6                  | 6           | 6                | 5           | x                     | x           | x                    | x           | x                    | x           |
| 2      | 2.74     | ND             |           |                          | x                   | x           | 6                  | x           | 6                | x           | 4                     | x           | 6                    | x           | 6                    | x           |
| 3      | 2.84     | ND             |           |                          | x                   | x           | x                  | x           | 6                | x           | 5                     | 5           | 6                    | x           | x                    | x           |
| 4      | 2.94     | ND             | ND        | Ethyl acetate            | 5                   | 6           | 6                  | 6           | 6                | 5           | 5                     | 5           | 6                    | 5           | 6                    | 6           |
| 5      | 3.39     | ND             |           |                          | x                   | x           | 6                  | x           | 6                | 5           | 6                     | 3           | x                    | x           | 6                    | 5           |
| 6      | 3.45     | ND             |           |                          | x                   | x           | x                  | x           | x                | x           | x                     | x           | 4                    | x           | 4                    | 6           |
| 7      | 3.49     | ND             |           |                          | 6                   | 5           | x                  | x           | x                | x           | x                     | x           | x                    | 5           | x                    | x           |
| 8      | 3.69     | 709            | 731       | Ethyl propionate         | 6                   | 6           | 6                  | 6           | 6                | 5           | 6                     | 5           | 6                    | 5           | 6                    | 6           |
| 9      | 3.94     | 732            |           |                          | 6                   | 6           | 6                  | x           | x                | x           | 5                     | x           | 5                    | 5           | 6                    | 6           |
| 10     | 4.08     | 744            |           |                          | x                   | 6           | 6                  | 6           | 6                | 5           | 6                     | 5           | 6                    | 5           | 4                    | 6           |
| 11     | 4.26     | 758            | 772       | Ethyl isobutyrate        | 6                   | 6           | x                  | x           | 5                | x           | 5                     | x           | 6                    | 5           | 6                    | 4           |
| 12     | 4.48     | 774            | 783       | Isobutyl acetate         | 6                   | 6           | 6                  | 6           | 6                | 5           | 6                     | x           | 6                    | x           | 6                    | x           |
| 13     | 4.62     | 784            |           |                          | x                   | x           | x                  | x           | x                | x           | 6                     | 5           | 6                    | 3           | 6                    | 6           |
| 14     | 4.89     | 801            | 803       | Ethyl butyrate           | 6                   | 6           | x                  | x           | 5                | x           | 5                     | 3           | x                    | 5           | 6                    | 6           |
| 15     | 5.05     | 811            | 817       | Butyl acetate            | 6                   | 6           | 6                  | 6           | 6                | 5           | 6                     | 5           | 6                    | 5           | 6                    | 5           |
| 16     | 5.14     | 817            |           |                          | 6                   | 6           | 6                  | 6           | 6                | 5           | 6                     | x           | 6                    | x           | 6                    | 5           |
| 17     | 5.52     | 838            |           |                          | 6                   | x           | x                  | x           | 5                | x           | 6                     | x           | 6                    | 5           | 6                    | x           |
| 18     | 5.85     | 856            | 858       | Ethyl isovalerate        | 6                   | 6           | 6                  | 6           | 6                | 5           | 6                     | 5           | 6                    | 5           | 6                    | 6           |
| 19     | 6.04     | 865            |           |                          | x                   | x           | x                  | x           | x                | x           | x                     | 3           | x                    | x           | x                    | x           |
| 20     | 6.16     | 871            |           |                          | 4                   | 4           | x                  | 6           | x                | x           | x                     | x           | x                    | x           | 6                    | x           |
| 21     | 6.23     | 874            |           |                          | x                   | 6           | x                  | x           | x                | x           | x                     | 5           | 6                    | 5           | x                    | 5           |
| 22     | 6.33     | 879            | 880       | Isoamyl acetate          | 6                   | 6           | 6                  | 6           | 6                | 5           | 6                     | 5           | 6                    | 5           | 6                    | 6           |
| 23     | 6.52     | 887            |           |                          | 6                   | x           | 6                  | x           | 6                | 5           | x                     | x           | x                    | x           | 6                    | x           |
| 24     | 6.64     | 893            | 892       | 2-Heptanone              | 6                   | 6           | 6                  | 6           | 6                | 5           | 6                     | 5           | 6                    | 5           | 6                    | 5           |
| 25     | 6.77     | 898            |           |                          | 6                   | 6           | 6                  | 6           | 6                | 5           | 6                     | 5           | 6                    | 5           | 6                    | 5           |
| 26     | 6.86     | 902            | 903       | 4-Pentenyl acetate       | 6                   | 6           | 6                  | 6           | 6                | 5           | 6                     | x           | 6                    | x           | 6                    | x           |
| 27     | 7.02     | 910            |           |                          | 5                   | x           | x                  | x           | x                | x           | 6                     | x           | 6                    | x           | 4                    | x           |
| 28     | 7.16     | 917            | 916       | 2,5-Dimethylpyrazine     | x                   | 6           | x                  | 6           | 6                | 5           | x                     | 5           | x                    | 5           | 6                    | 6           |
| 29     | 7.38     | 927            |           |                          | x                   | x           | 6                  | 6           | 6                | 5           | x                     | x           | x                    | x           | x                    | x           |
| 30     | 7.51     | 933            |           |                          | 6                   | 5           | 6                  | 6           | x                | x           | 6                     | x           | 6                    | x           | 6                    | 6           |
| 31     | 7.66     | 940            |           |                          | 5                   | 6           | x                  | x           | x                | x           | 5                     | 5           | x                    | x           | 6                    | 6           |
| 32     | 7.86     | 948            |           |                          | 6                   | 6           | 6                  | 6           | 6                | 5           | 6                     | 5           | 6                    | 5           | 6                    | 6           |
| 33     | 8.32     | 967            |           |                          | x                   | x           | 6                  | x           | 6                | x           | x                     | 6           | x                    | x           | x                    | x           |
| 34     | 8.48     | 973            | 973       | Isoamyl propionate       | 6                   | 6           | 6                  | 6           | 6                | 5           | 6                     | x           | 5                    | 5           | 6                    | 6           |
| 35     | 8.71     | 982            |           |                          | 6                   | 6           | 6                  | 6           | 6                | 4           | 6                     | 5           | 6                    | 5           | 6                    | 6           |
| 36     | 8.93     | 990            | 989       | 6-Methyl-5-heptene-2-one | 6                   | 6           | 6                  | 6           | 6                | 5           | 6                     | 5           | 6                    | 5           | 6                    | 6           |
| 37     | 9.07     | 995            |           |                          | x                   | x           | x                  | x           | x                | x           | x                     | x           | x                    | x           | 6                    | 6           |
| 38     | 9.11     | 996            | 997       | Furfuryl acetate         | x                   | x           | x                  | 6           | 6                | 5           | 6                     | 5           | x                    | x           | x                    | x           |
| 39     | 9.23     | 1000           | 999       | Ethyl hexanoate          | 6                   | 6           | x                  | 6           | x                | 5           | x                     | 5           | x                    | 5           | 6                    | 6           |
| 40     | 9.36     | 1006           |           |                          | x                   | x           | x                  | x           | x                | x           | x                     | x           | x                    | x           | 6                    | 6           |
| 41     | 9.40     | 1008           |           |                          | x                   | 6           | 6                  | 4           | 5                | 5           | 5                     | 5           | x                    | 5           | x                    | 6           |
| 42     | 9.69     | 1020           |           |                          | x                   | 6           | 6                  | 6           | 6                | 5           | 6                     | 5           | 5                    | 5           | 6                    | 6           |
| 43     | 9.98     | 1032           |           |                          | 5                   | x           | 6                  | x           | x                | x           | 6                     | 5           | 6                    | 5           | 6                    | 6           |
| 44     | 10.40    | 1049           |           |                          | 6                   | x           | 5                  | 6           | 4                | x           | x                     | x           | 4                    | x           | 6                    | x           |
| 45     | 11.59    | 1093           |           |                          | x                   | x           | 6                  | x           | 6                | x           | 6                     | x           | 5                    | x           | 6                    | x           |
| 46     | 11.98    | 1107           |           |                          | 6                   | 5           | 6                  | 6           | 6                | 5           | 6                     | 5           | 6                    | 5           | 6                    | 6           |
| 47     | 12.19    | 1116           |           |                          | 6                   | 6           | 6                  | 6           | 6                | 5           | 6                     | 5           | 6                    | 5           | 6                    | 6           |
| 48     | 12.46    | 1127           |           |                          | x                   | 6           | 6                  | 6           | 6                | 5           | 4                     | 5           | 6                    | 5           | 6                    | 6           |
| 49     | 12.48    | 1128           |           |                          | x                   | x           | x                  | x           | 6                | x           | x                     | x           | x                    | x           | x                    | x           |
| 50     | 15.05    | 1227           |           |                          | 4                   | x           | x                  | x           | x                | x           | x                     | x           | x                    | 5           | 6                    | x           |
| 51     | 15.91    | 1261           | 1261      | 2-Phenethyl acetate      | x                   | x           | 6                  | 6           | 6                | 5           | x                     | x           | x                    | x           | x                    | x           |
| 52     | 18.28    | 1358           |           |                          | x                   | x           | 5                  | 6           | x                | x           | x                     | x           | x                    | x           | x                    | x           |
| 53     | 20.61    | 1456           |           |                          | x                   | x           | x                  | x           | x                | x           | x                     | 4           | x                    | x           | x                    | x           |

ND = Not determined

x = Absence of response, either due to the absence or lower amounts (below detection threshold) of a given chemical constituent

\* = Identification was based on (1) matching Kovats Indices between FID and MS, (2) comparing spectra with MS library, (3) confirming KI and biological activity of each synthetic standard

**Supplementary Table S2. A compilation of the constituents selected for electrophysiological**

**and yeast chemical analyses assigned with unique compound ID.**

| Compound ID | Identified constituents   | CAS #     | Retention time (min.) | Kovats Index |
|-------------|---------------------------|-----------|-----------------------|--------------|
| 1*          |                           |           | 2.62                  | ND           |
| 2           |                           |           | 2.74                  | ND           |
| 3           |                           |           | 2.84                  | ND           |
| 3a          |                           |           | 2.93                  | ND           |
| 4*          | Ethyl acetate             | 141-78-6  | 2.94                  | ND           |
| 4a          | 2-Methyl-1-propanol       | 78-83-1   | 3.02                  | ND           |
| 5           |                           |           | 3.39                  | ND           |
| 6           |                           |           | 3.45                  | ND           |
| 7           |                           |           | 3.49                  | ND           |
| 8*          | Ethyl propionate          | 105-37-3  | 3.69                  | 709          |
| 9           | Isoamyl alcohol           | 123-51-3  | 3.94                  | 732          |
| 9a          | 1-Pentanol                | 71-41-0   | 3.98                  | 736          |
| 9b          | 2-Methyl-1-butanol        | 137-32-6  | 4.02                  | 738          |
| 10          |                           |           | 4.08                  | 744          |
| 11*         | Ethyl isobutyrate         | 97-62-1   | 4.26                  | 758          |
| 12*         | Isobutyl acetate          | 110-19-0  | 4.48                  | 774          |
| 13          |                           |           | 4.62                  | 784          |
| 14*         | Ethyl butyrate            | 105-54-4  | 4.89                  | 801          |
| 15*         | Butyl acetate             | 123-86-4  | 5.05                  | 811          |
| 16*         |                           |           | 5.14                  | 817          |
| 17*         |                           |           | 5.52                  | 838          |
| 18*         | Ethyl isovalerate         | 108-64-5  | 5.85                  | 856          |
| 19          |                           |           | 6.04                  | 865          |
| 20          |                           |           | 6.16                  | 871          |
| 21          |                           |           | 6.23                  | 874          |
| 22*         | Isoamyl acetate           | 123-92-2  | 6.33                  | 879          |
| 22a         | 2-Methylbutyl acetate     | 624-41-9  | 6.38                  | 881          |
| 23          |                           |           | 6.52                  | 887          |
| 24*         | 2-Heptanone               | 110-43-0  | 6.64                  | 893          |
| 25*         |                           |           | 6.77                  | 898          |
| 26*         | 4-Pentenyl acetate        | 1576-85-8 | 6.86                  | 902          |
| 27          |                           |           | 7.02                  | 910          |
| 28*         | 2,5-Dimethylpyrazine      | 123-32-0  | 7.16                  | 917          |
| 29          |                           |           | 7.38                  | 927          |
| 30          |                           |           | 7.51                  | 933          |
| 31          |                           |           | 7.66                  | 940          |
| 32*         | Citraconic anhydride      | 616-02-4  | 7.86                  | 948          |
| 33          | Benzaldehyde              | 100-52-7  | 8.32                  | 967          |
| 34*         | Isoamyl propionate        | 105-68-0  | 8.48                  | 973          |
| 35          | 3-(Methylthio)-1-propanol | 505-10-2  | 8.71                  | 982          |
| 35a         | Phenol                    | 108-95-2  | 8.75                  | 983          |
| 36*         | 6-Methyl-5-heptene-2-one  | 110-93-0  | 8.93                  | 990          |
| 37          |                           |           | 9.07                  | 995          |
| 38*         | Furfuryl acetate          | 623-17-6  | 9.11                  | 996          |
| 39*         | Ethyl hexanoate           | 123-66-0  | 9.23                  | 1000         |
| 39a         | Octanal                   | 124-13-0  | 9.30                  | 1004         |
| 40          |                           |           | 9.36                  | 1006         |
| 41          |                           |           | 9.40                  | 1008         |
| 42          |                           |           | 9.69                  | 1020         |
| 43          |                           |           | 9.98                  | 1032         |
| 44          |                           |           | 10.40                 | 1049         |
| 45          |                           |           | 11.59                 | 1093         |
| 46          | Nonanal                   | 124-19-6  | 11.98                 | 1107         |
| 47          |                           |           | 12.19                 | 1116         |
| 47a         | 2-Phenylethanol           | 60-12-8   | 12.20                 | 1116         |
| 48*         |                           |           | 12.46                 | 1127         |
| 49          |                           |           | 12.48                 | 1128         |
| 49a         | Ethyl octanoate           | 106-32-1  | 14.38                 | 1199         |
| 49b         | Decanal                   | 112-31-2  | 14.58                 | 1207         |
| 50          |                           |           | 15.05                 | 1227         |
| 51*         | 2-Phenethyl acetate       | 103-45-7  | 15.91                 | 1261         |
| 52          | Phenethyl propionate      | 122-70-3  | 18.28                 | 1358         |
| 52a         | Ethyl decanoate           | 110-38-3  | 19.27                 | 1397         |
| 53          | Geranylacetone            | 689-67-8  | 20.61                 | 1456         |
| 53a         | Farnesol                  | 4602-84-0 | 20.88                 | 1468         |

ND = Not determined

\* = Top 10 most effective yeast constituents

Supplementary Figure S1. Annotated chemical profiles (TIC) of six yeast species.

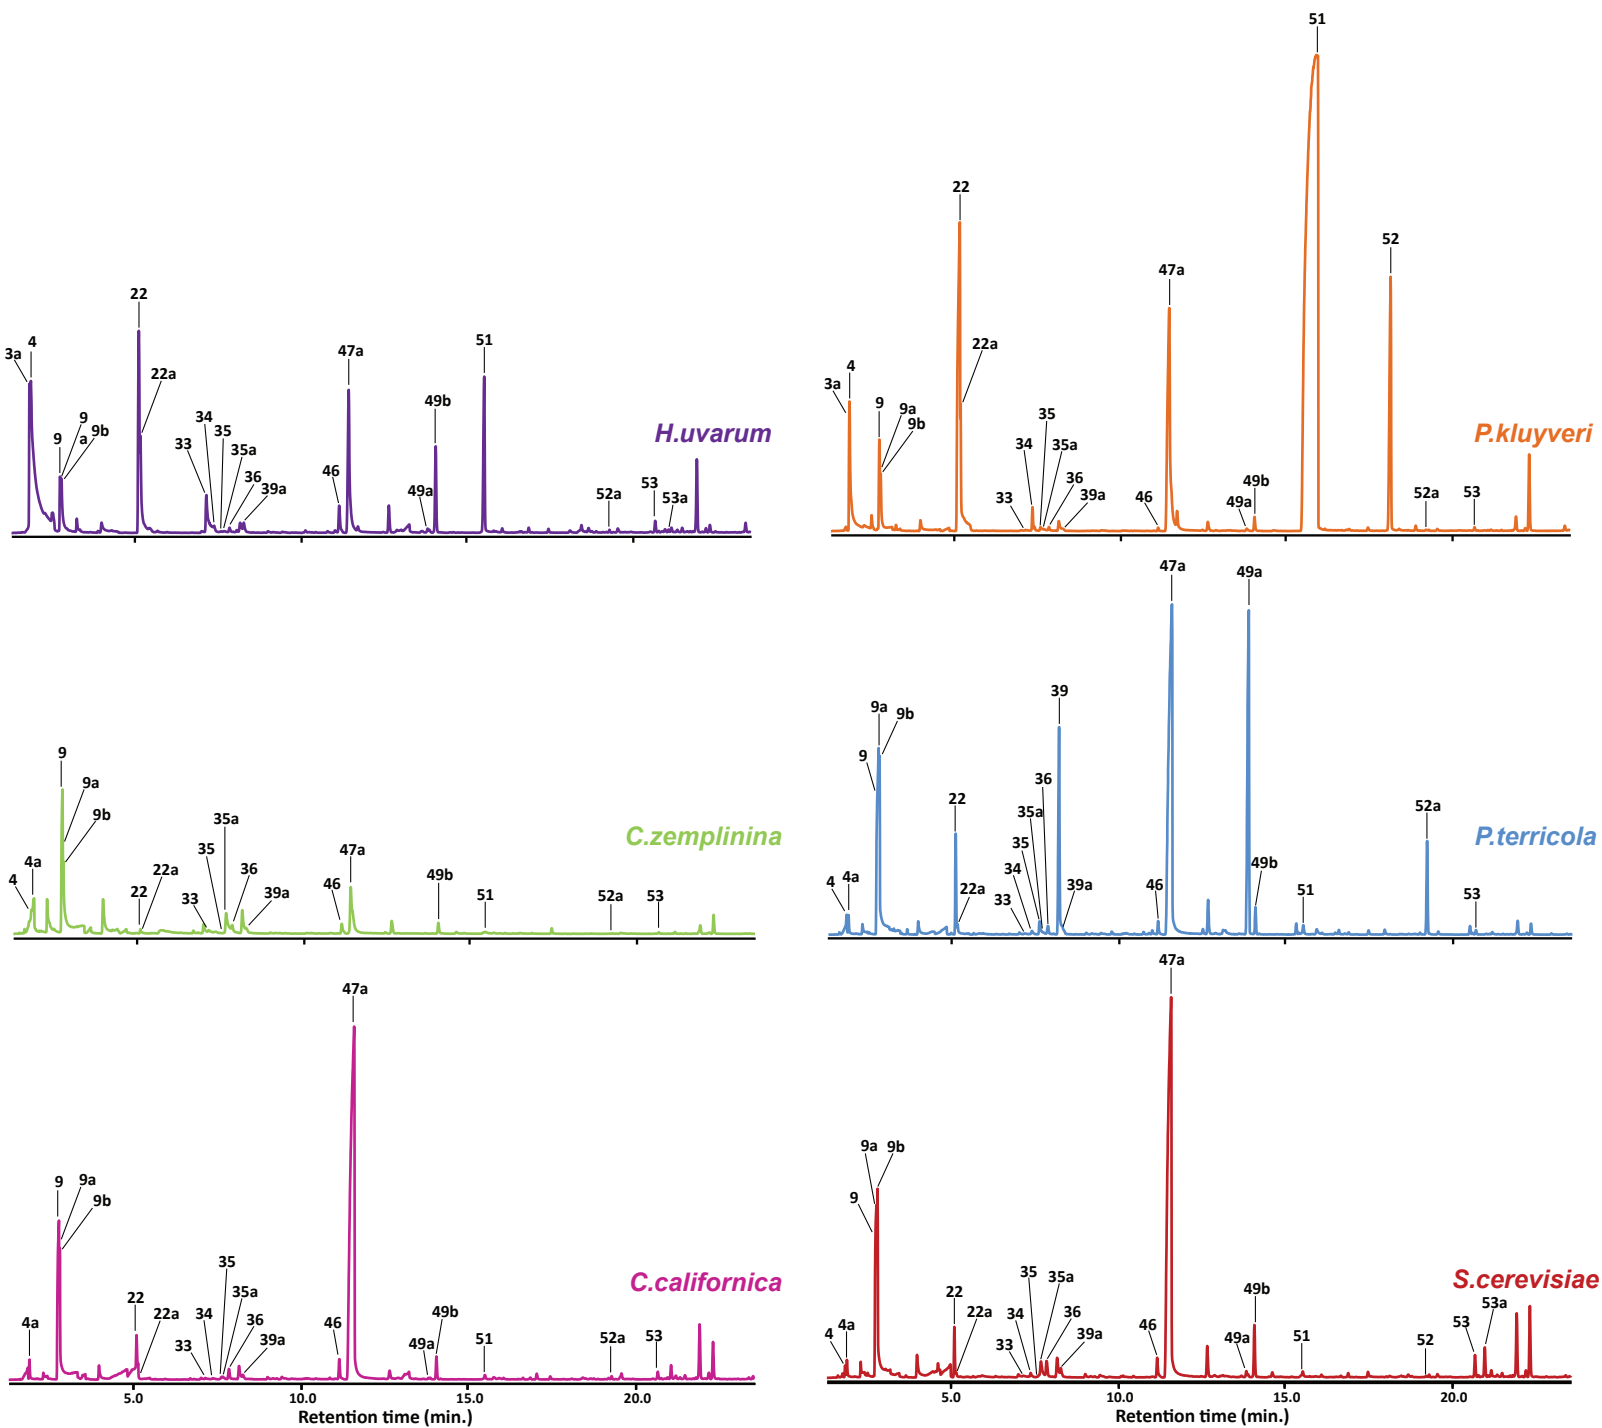

**Supplementary Figure S2. Variation in constituent abundances among yeasts as exemplified**

**in the PCA (in Fig. 2).** Unique ID of each compound is in parentheses whereas an asterisk (\*)

indicates that the identification was confirmed with synthetic standards. For each yeast profile, the

constituents not part of the initial selection were retrieved or determined not present. Values are

percent abundance of the total area (N = 5-7; mean  $\pm$  SEM).

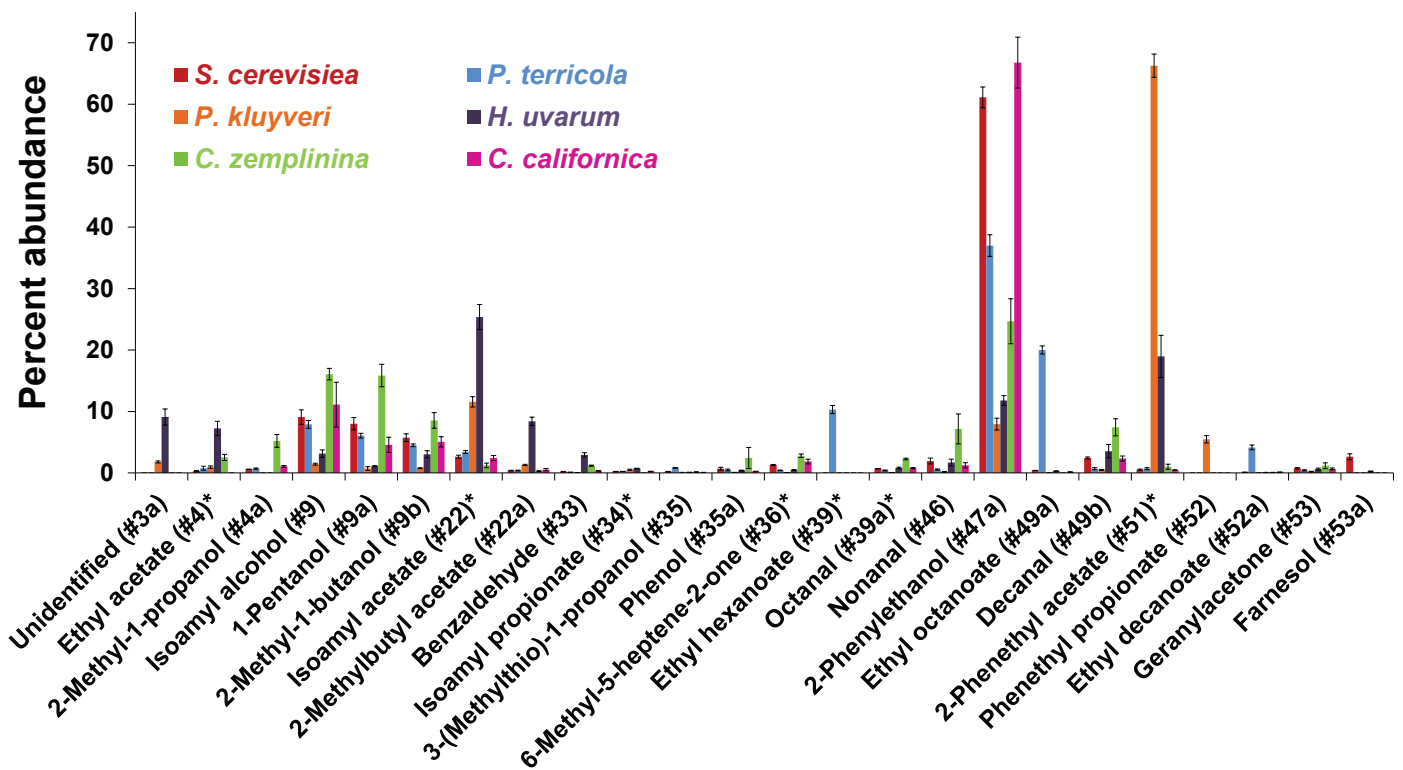

**Supplementary Figure S3. Representative GC-EAD profiles.** FID traces are represented at the bottom (colored) whereas antennal responses are above [*D. sukuzii* (top gray trace) and *D. melanogaster* (middle black)]. Annotated GC-EAD (boxed) profile is from *H. uvarum*.

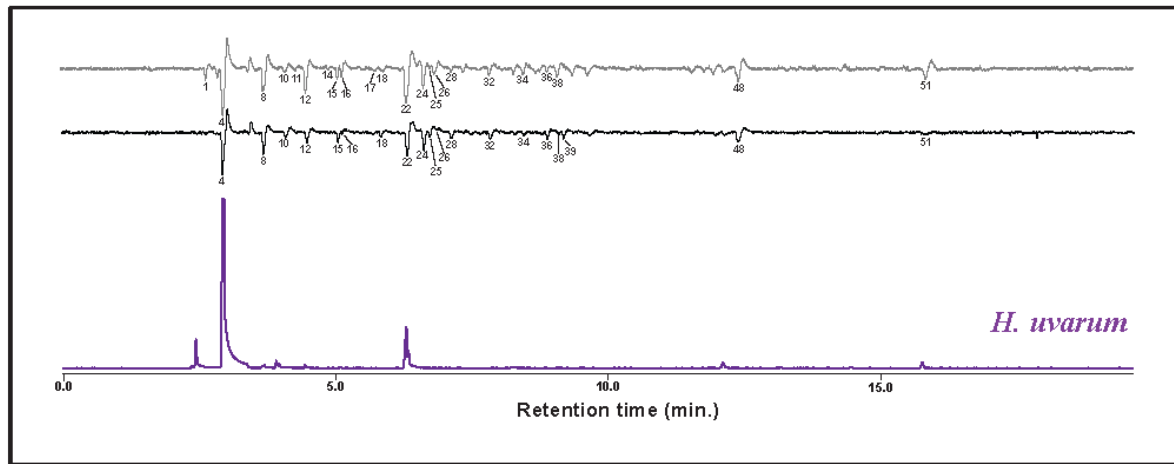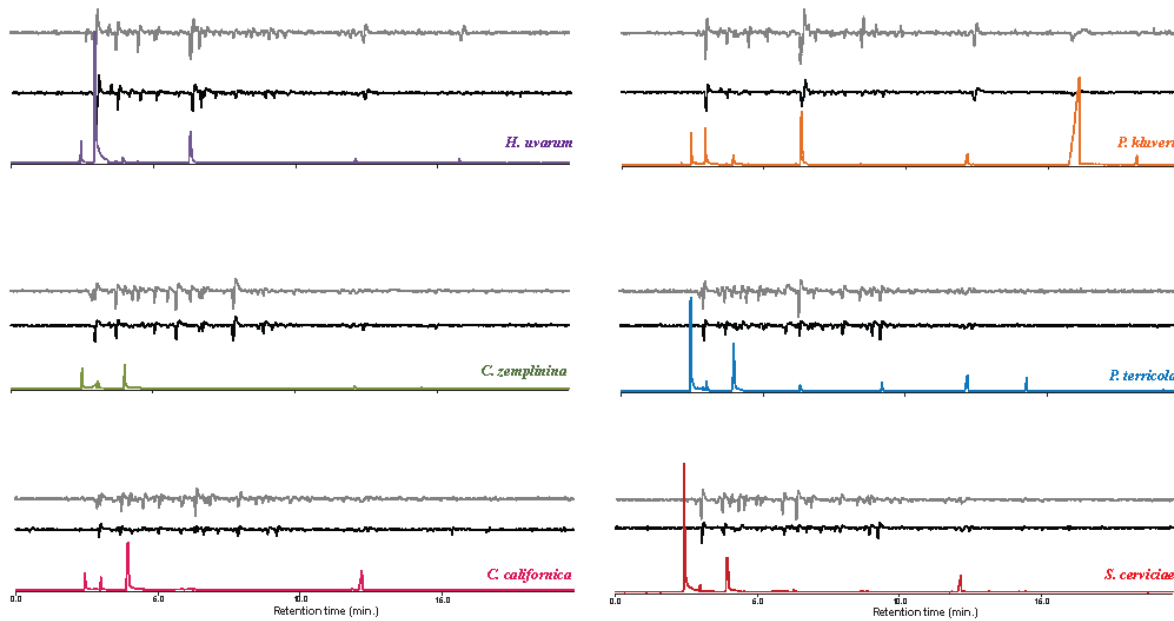

**Supplementary Figure S4. Correlation of the relative VOC abundance between yeast spp. and the physiological responses measured from two fly species.**

VOCs were produced in varying amounts in each yeast spp. (bottom graph) and elicited antennal responses characterized by different sensitivity and selectivity between *D. melanogaster* (middle) and *D. sukuzii* (top). For example, antennal responses to ethyl acetate are comparable, whereas isoamyl acetate and ethyl hexanoate (highlighted with an outline) elicit variable responses between two fly species.

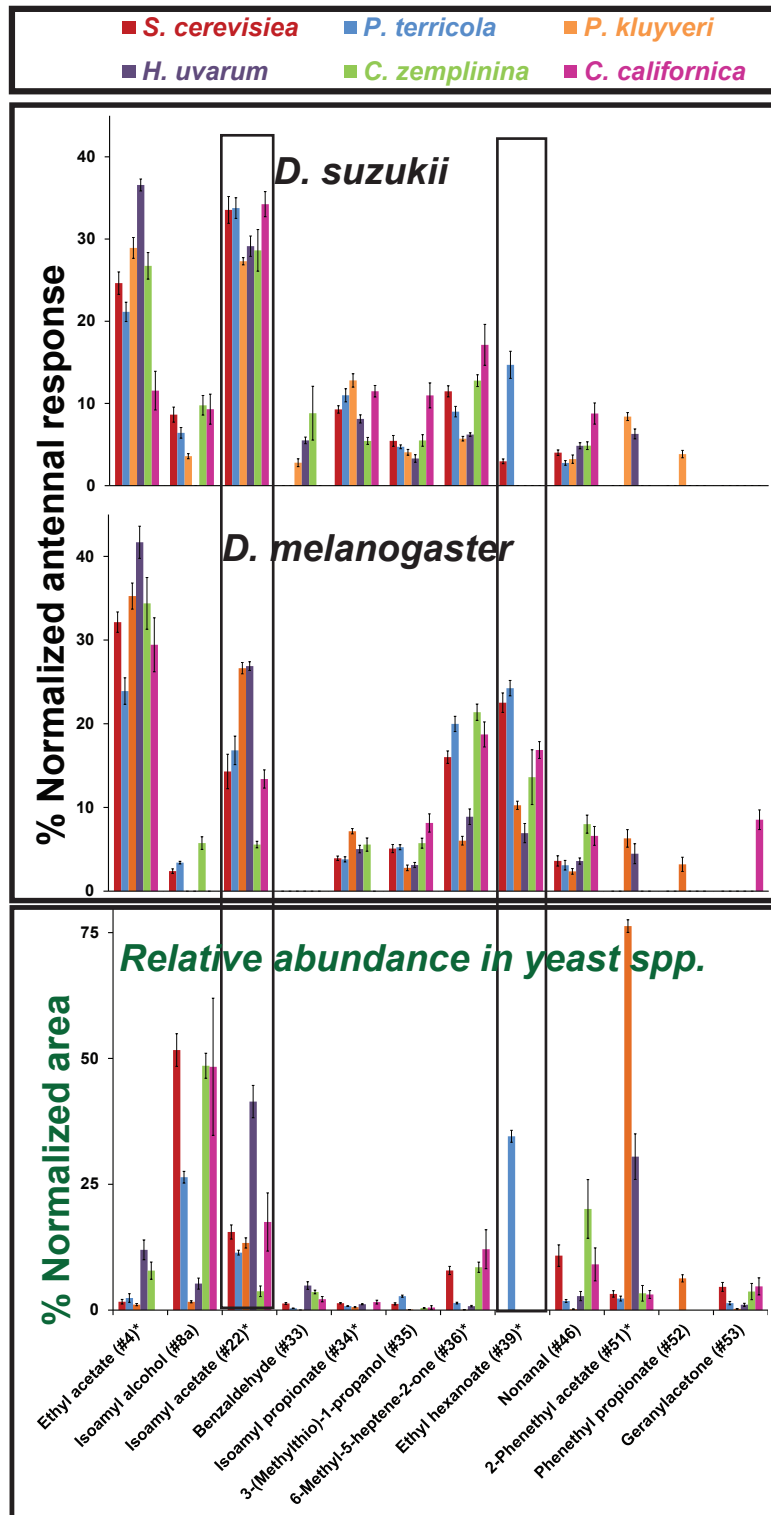

**Supplementary Figure S5. Trap and assay details for behavioral experiments.** *Left* Trap made by modifying a 1.5 mL centrifuge tube and a 1000  $\mu$ l pipette tip; *Middle* Binary choice assay used for testing one yeast species against a control (PDB); *Right* Multi-choice assay for determining fly preferences to multiple yeasts spp.

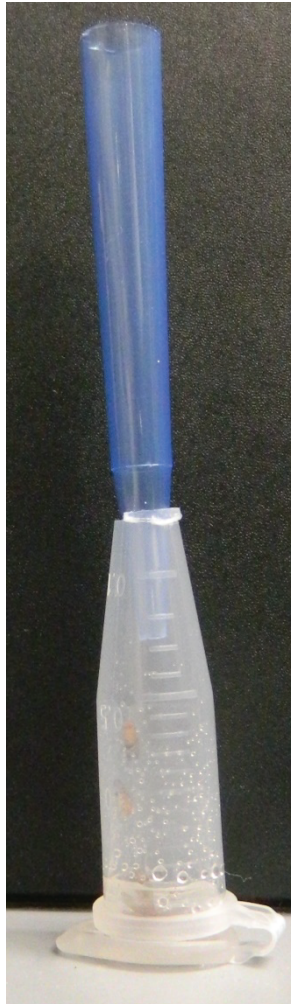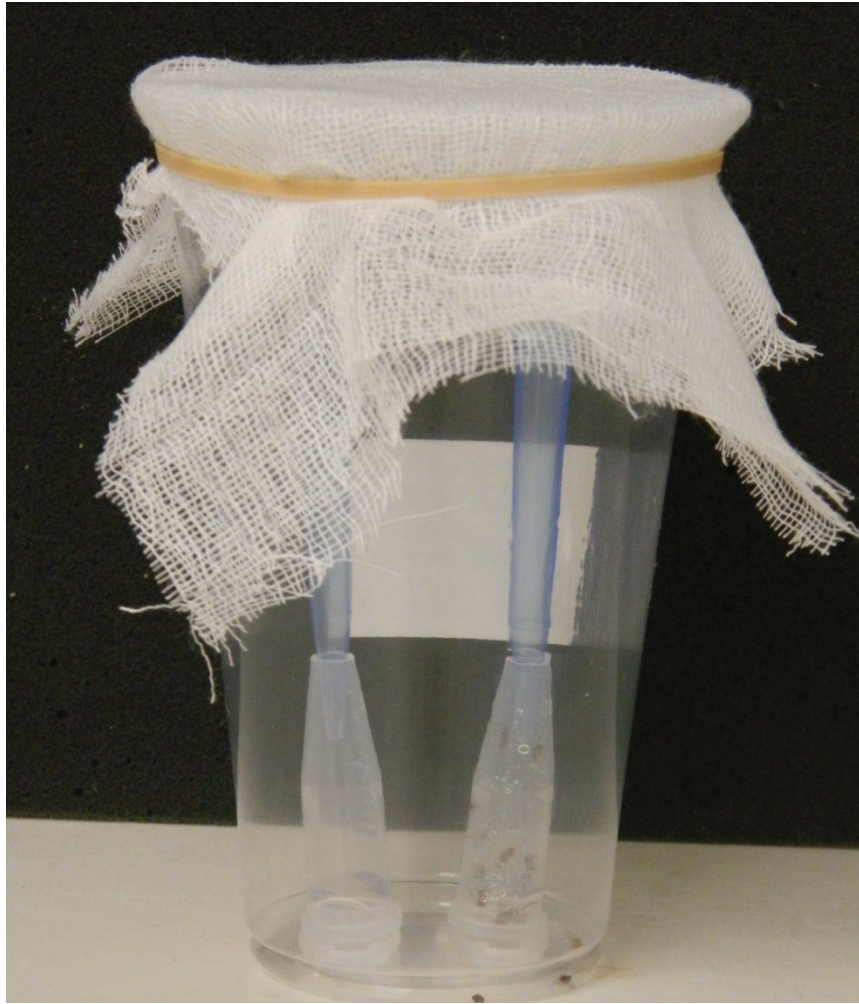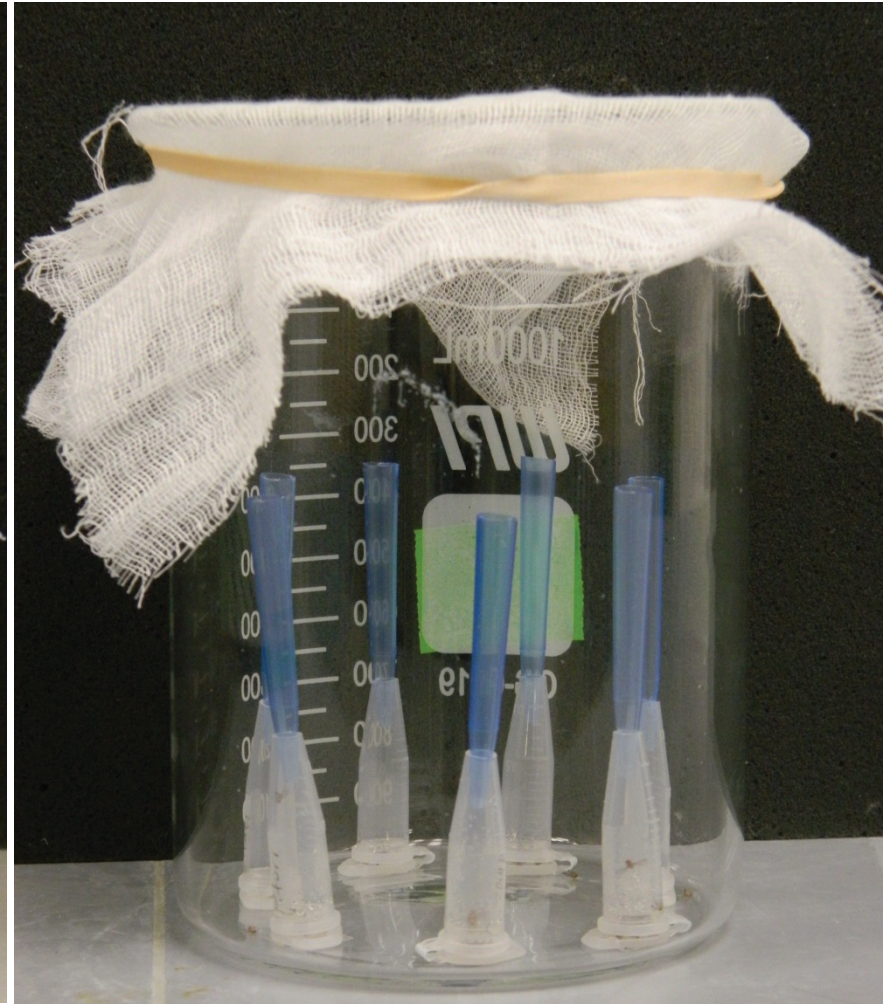

Supplement: srep14059-s1.pdf [file srep14059-s1.pdf]
